# Supplementary material for: An application of upscaled optimal foraging theory using hidden Markov modelling: year-round behavioural variation in a large arctic herbivore
Source: PubMed Central journal article supplement (PMC7275509; doi:10.1186/s40462-020-00213-x), 2020-06-05
Supplement: 40462_2020_213_MOESM1_ESM.pdf [file 40462_2020_213_MOESM1_ESM.pdf]

1 **Supplementary materials**

2  
3 **An application of upscaled optimal foraging theory using hidden Markov modelling: year-**  
4 **round behavioural variation in a large arctic herbivore**

5  
6 Larissa T. Beumer<sup>1,2,\*</sup>, Jennifer Pohle<sup>3</sup>, Niels M. Schmidt<sup>1,2</sup>, Marianna Chimienti<sup>1,2</sup>, Jean-Pierre  
7 Desforges<sup>1,2,4</sup>, Lars H. Hansen<sup>1,2</sup>, Roland Langrock<sup>3</sup>, Stine Højlund Pedersen<sup>5,6</sup>, Mikkel Stelvig<sup>7</sup>,  
8 Floris M. van Beest<sup>1,2</sup>

9  
10 <sup>1</sup> Department of Bioscience, Aarhus University, 4000 Roskilde, Denmark

11 <sup>2</sup> Arctic Research Centre, Aarhus University, 8000 Aarhus C, Denmark

12 <sup>3</sup> Department of Business Administration and Economics, Bielefeld University, 33615 Bielefeld,  
13 Germany

14 <sup>4</sup> Natural Resource Sciences, McGill University, Ste Anne de Bellevue, Quebec H9X 3V9, Canada

15 <sup>5</sup> Cooperative Institute for Research in the Atmosphere, Colorado State University, Fort Collins, CO  
16 80523, USA

17 <sup>6</sup> Department of Biological Sciences, University of Alaska Anchorage, Anchorage, AK 99508, USA

18 <sup>7</sup> Copenhagen Zoo, 2000 Frederiksberg, Denmark

19  
20 \* Corresponding author: [larissa.beumer@bios.au.dk](mailto:larissa.beumer@bios.au.dk)

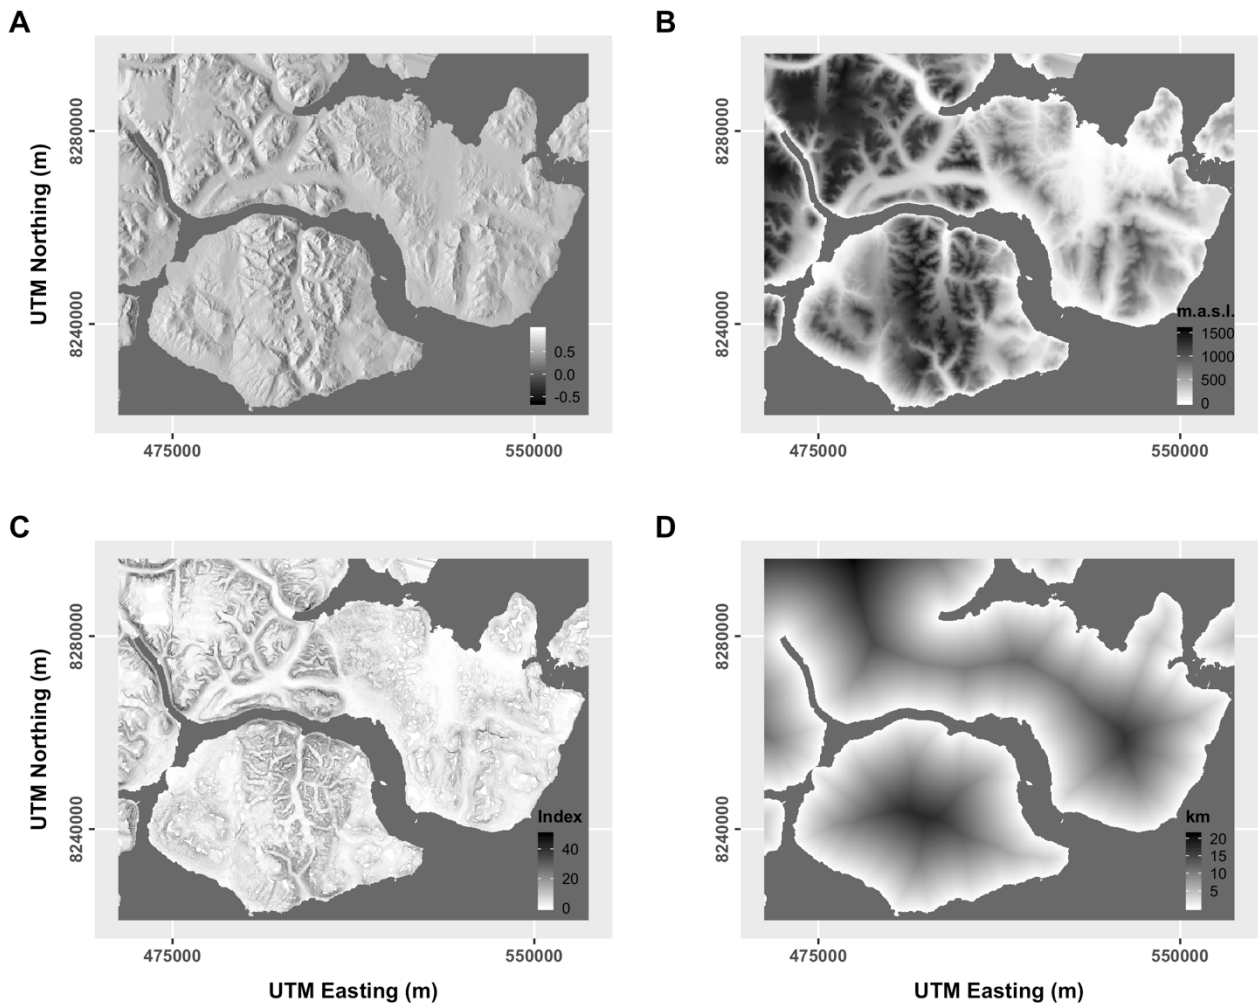

21

22 Figure S1: Distribution of static covariates across the study area (WGS 84, UTM zone 27): (A)  
 23 'hillshade' (unitless), (B) elevation (meters above sea level), (C) terrain ruggedness (index) and (D)  
 24 distance to coast (km). Dark grey background colour indicates ocean areas.

**A**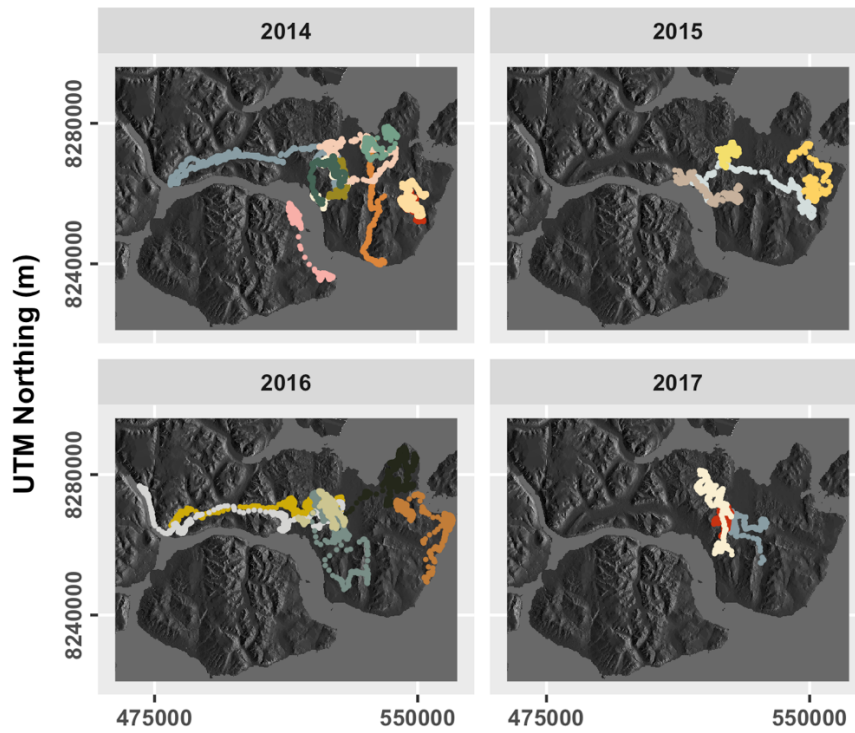**B**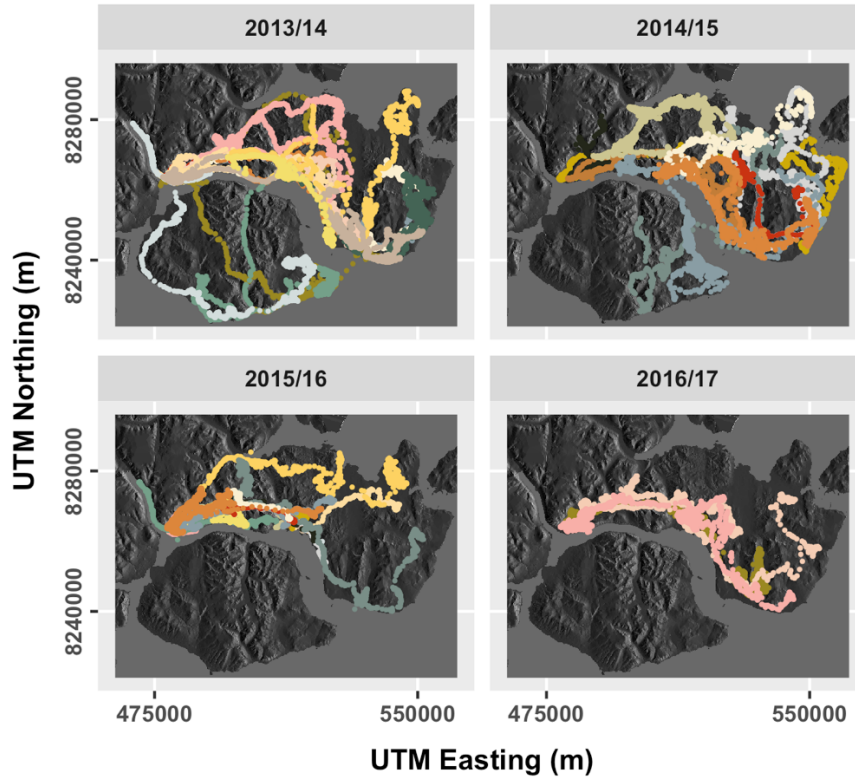

25

26 Figure S2: Muskox observations classified as either (A) snow-free summer or (B) snow-covered

27 winter bursts, colour-coded by burst ID per season.

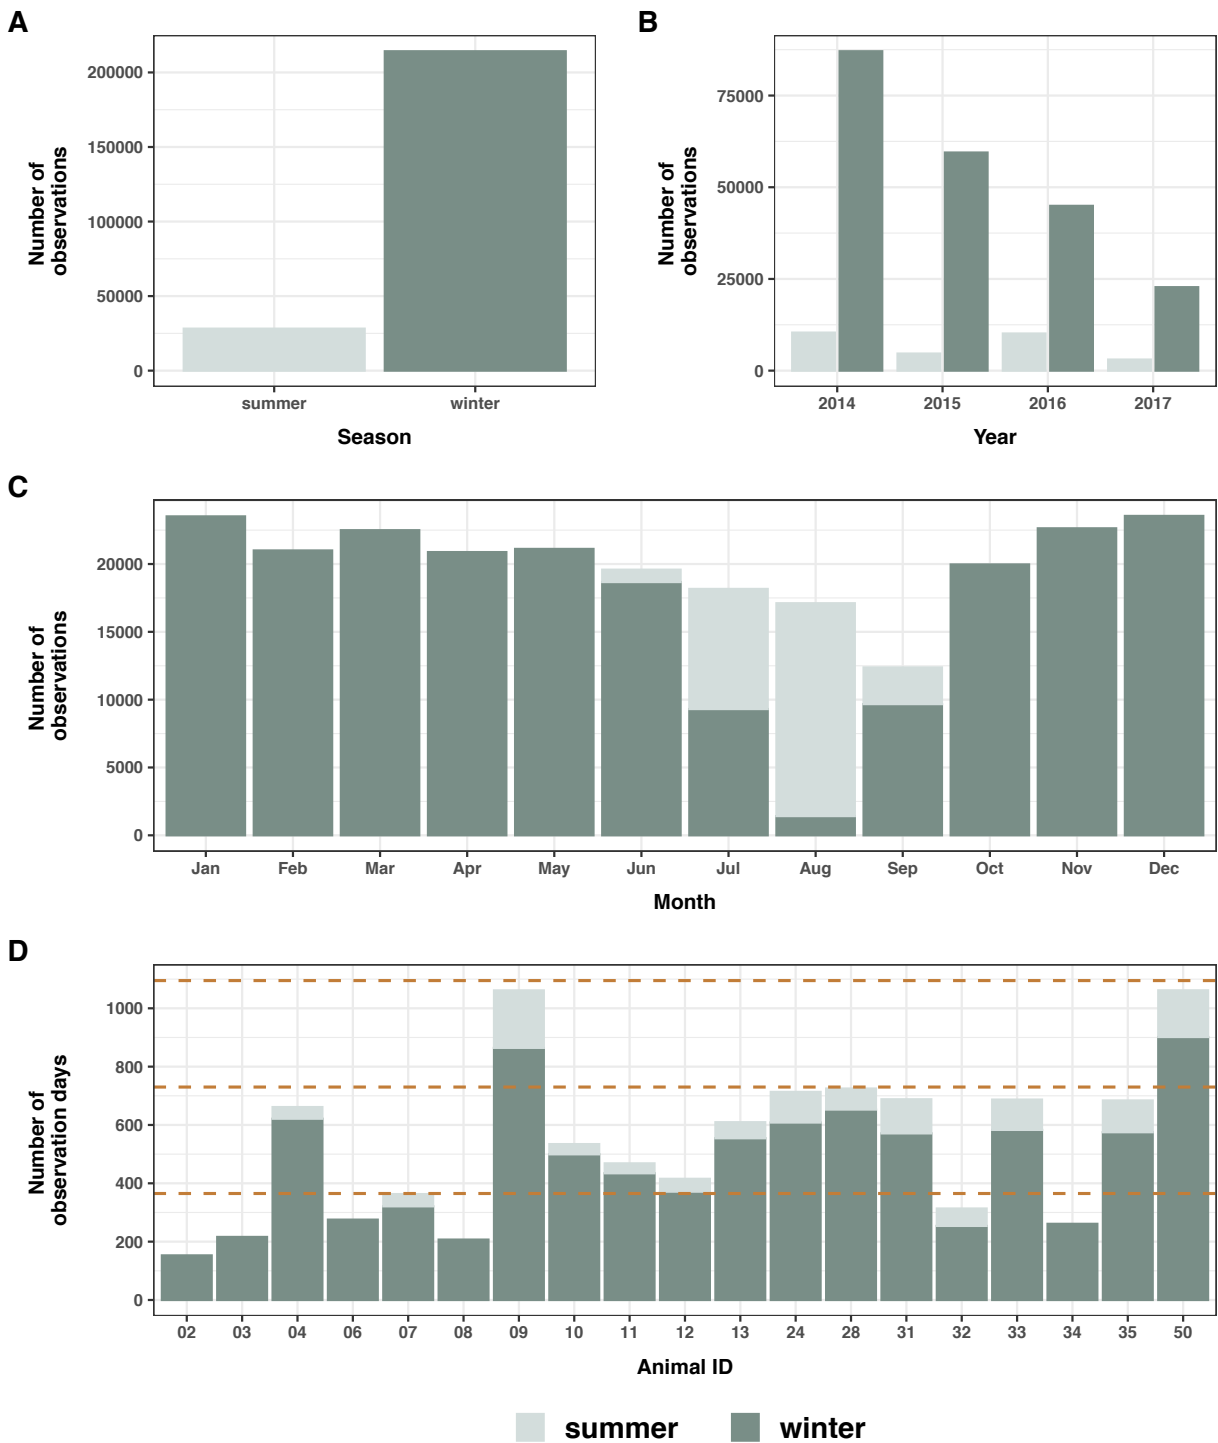

28  
 29 Figure S3: Overview of muskox observations (n = 242378) included in this study. Number of  
 30 observations (A) included in the Hidden Markov model for the snow-free summer and the snow-  
 31 covered winter season, respectively, (B) detailed per season and year and (C) per month. (D) Number  
 32 of observation days per animal, i.e. female adult muskox included in the study (n = 19). Brown dashed  
 33 lines indicate 365, 730 and 1095 days (i.e. 1, 2 and 3 years) of tracking data, respectively. Note that  
 34 in (B) year t denotes the winter season t-1 to t, i.e. for instance 2014 is the winter 2013-2014.

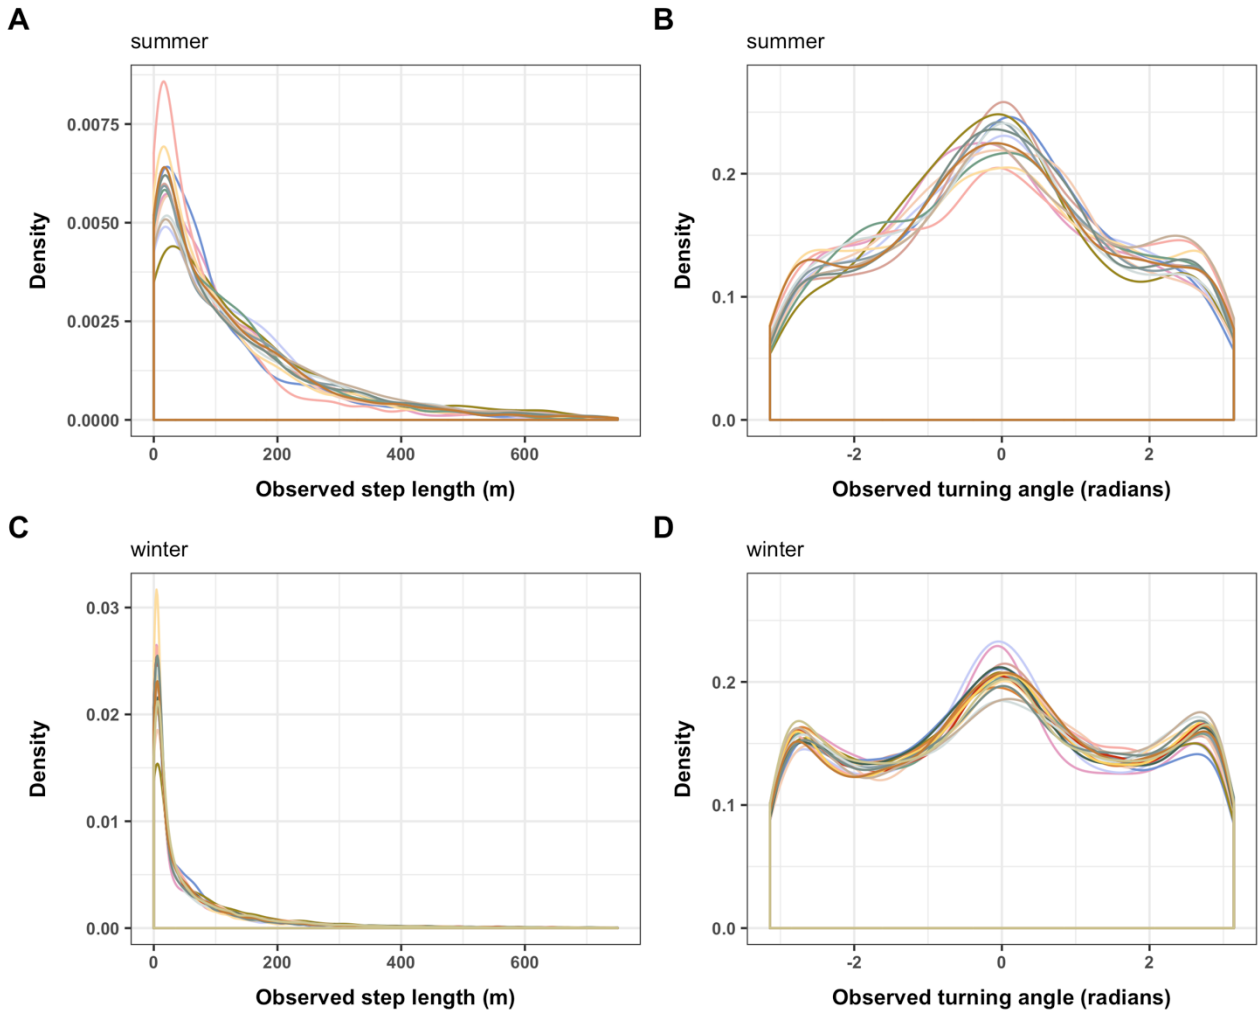

35

36 Figure S4: Individual variation in movement variables (kernel density estimates of observed step  
 37 lengths and turning angles) during the snow-free summer (A-B) and the snow-covered winter season  
 38 (C-D).

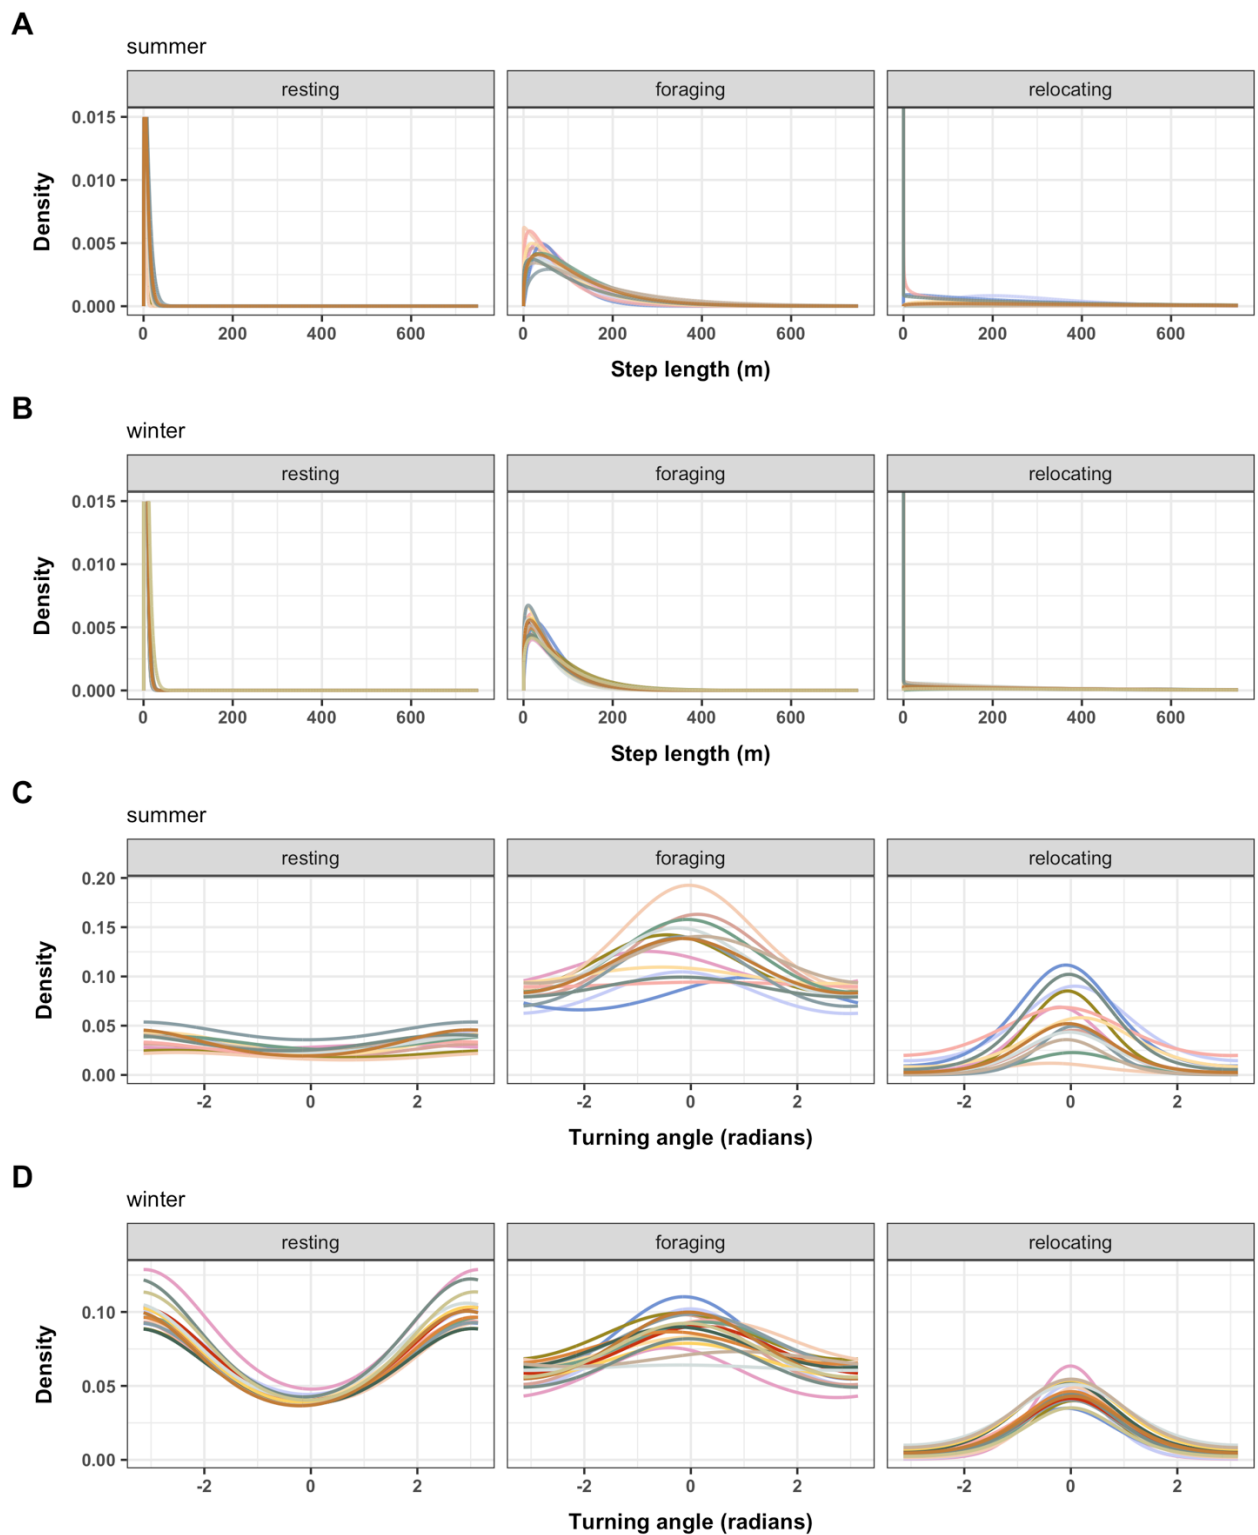

39

40 Figure S5: Individual variation in state-dependent distributions for step length and turning angles,  
 41 derived from 3-state HMMs, fitted separately for each animal/season. For each model, 10 sets of  
 42 random starting values were tested; results are shown for the model with highest log-likelihood  
 43 values. Models did not include covariates.

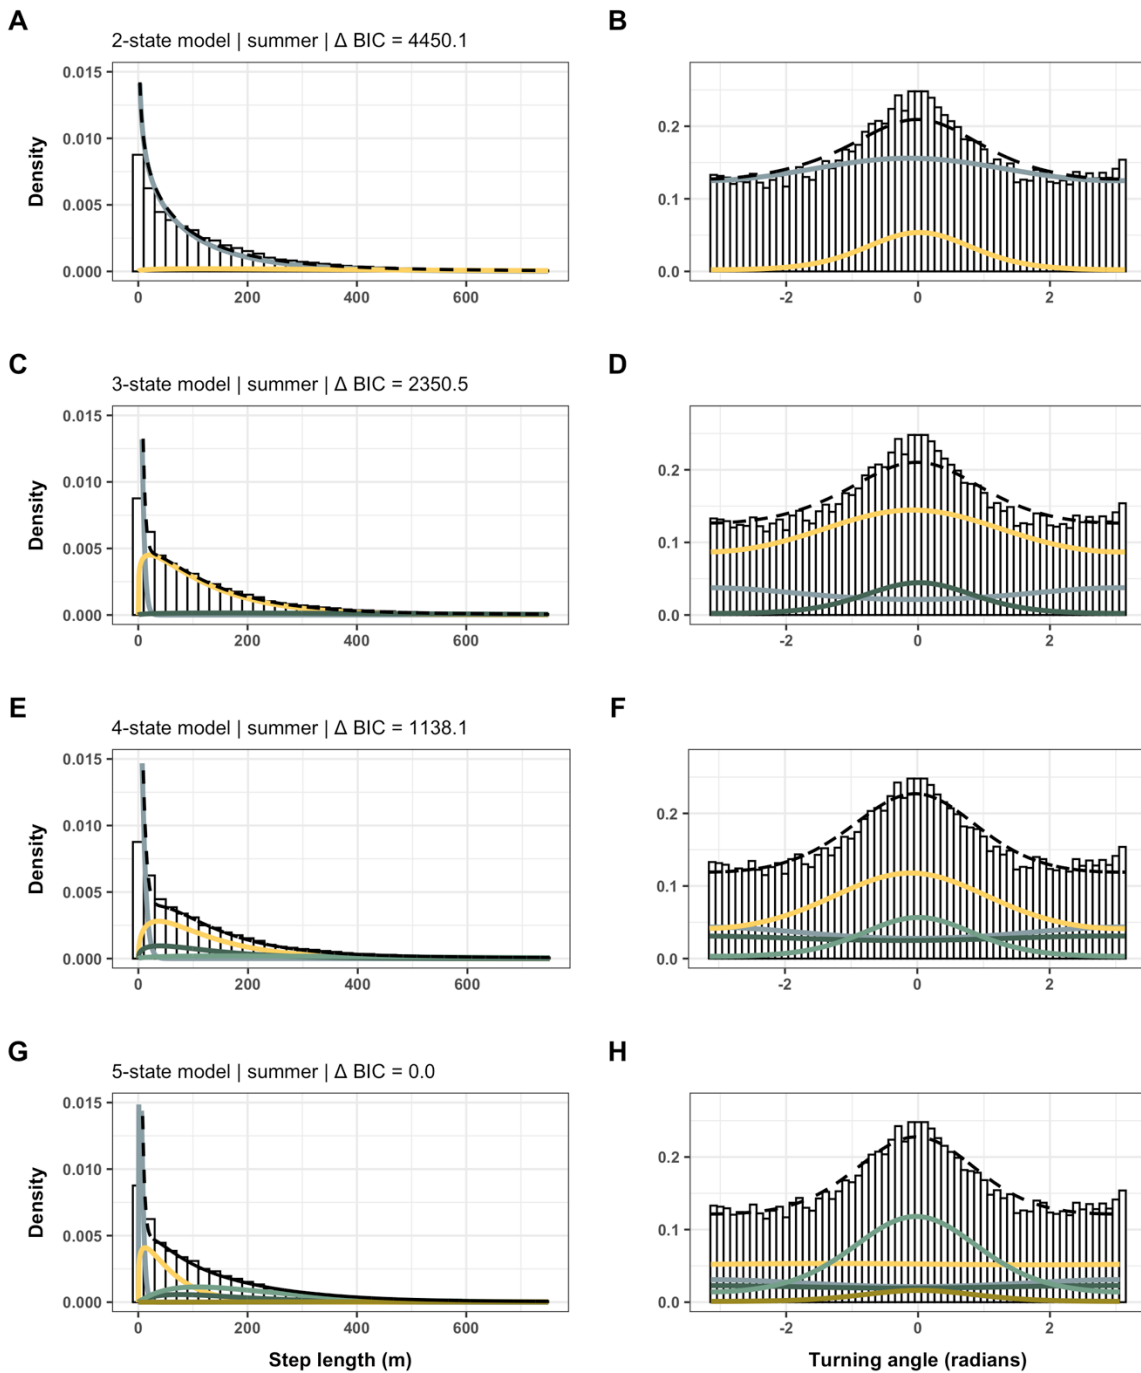

44

45 Figure S6: Histograms of step length and turning angle between hourly relocations, respectively, for  
 46 the summer season, overlaid with the state-dependent distributions as estimated by initially explored  
 47 HMMs including 2 (A-B), 3 (C-D), 4 (E-F) and 5 (G-H) states without covariates. We tested 10 sets  
 48 of starting values for each model, respectively. The state-dependent distributions were weighted  
 49 according to the proportion of time spent in the different states, as inferred by the Viterbi sequence.  
 50 Dashed black lines indicate the associated marginal observation distributions. Note that the x- and y-  
 51 axes for step length were truncated at the upper range limit to facilitate visualisation (maximum  
 52 observed step length was 3486 m). Delta BIC values (differences between the respective model and  
 53 the best-ranked model) are provided in panel titles for model comparison.

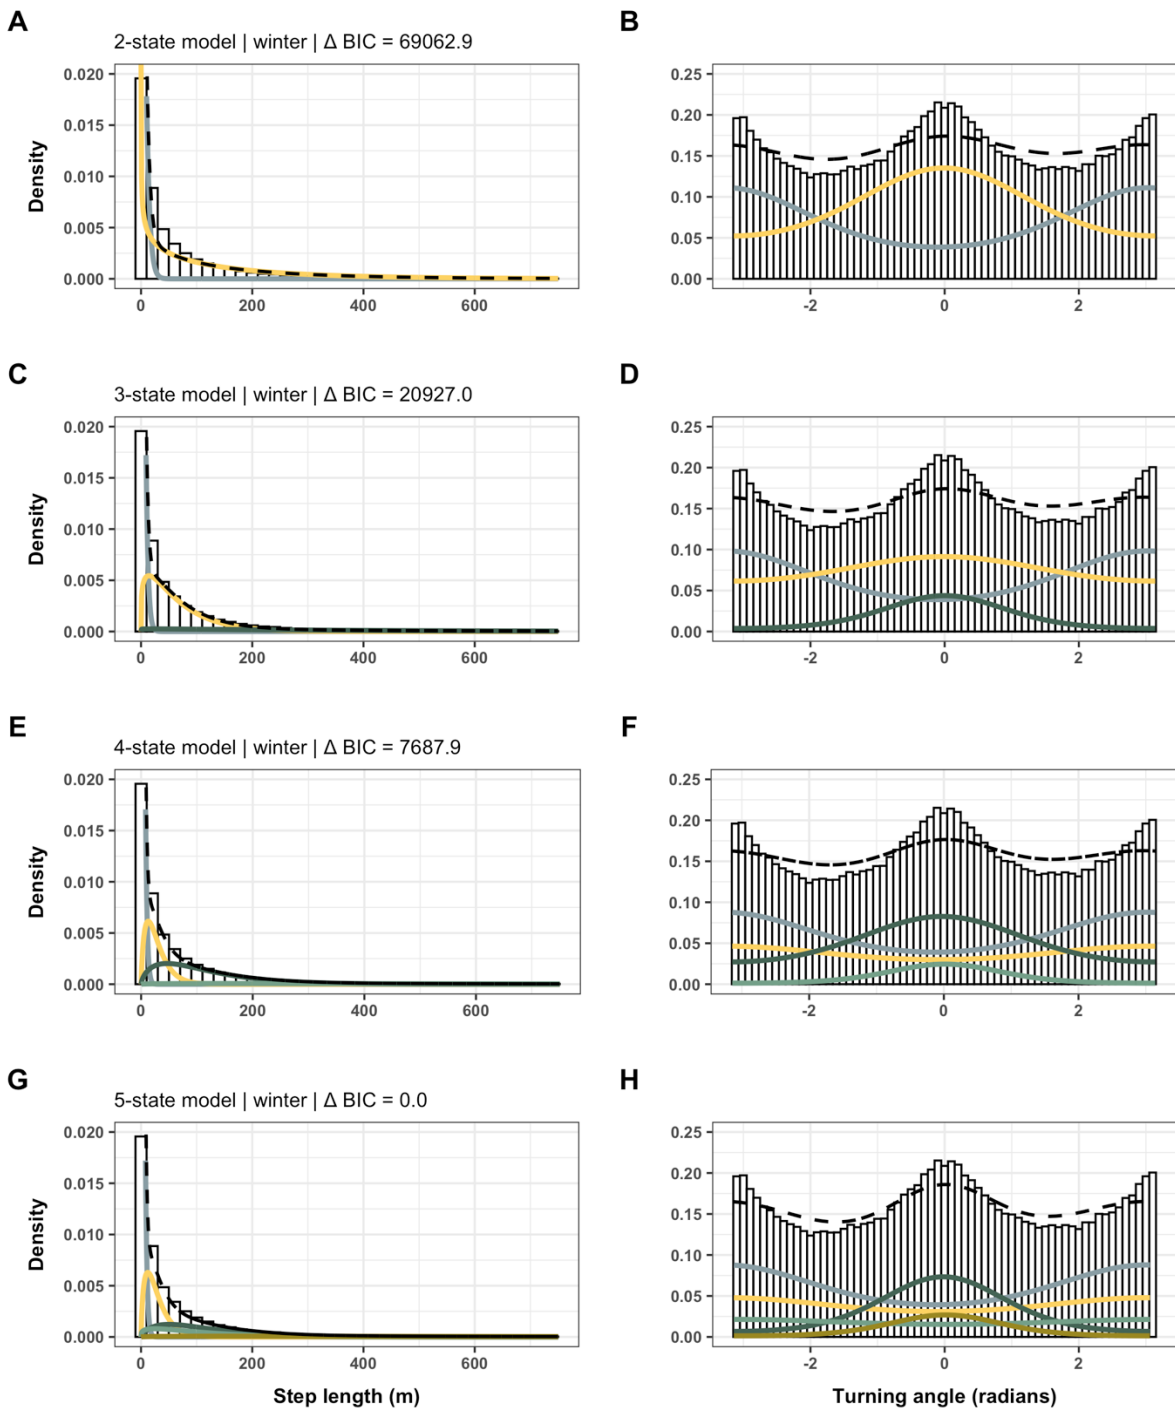

54

55 Figure S7: Histograms of step length and turning angle between hourly relocations, respectively, for  
 56 the winter season, overlaid with the state-dependent distributions as estimated by initially explored  
 57 HMMs including 2 (A-B), 3 (C-D), 4 (E-F) and 5 (G-H) states without covariates. We tested 10 sets  
 58 of starting values for each model, respectively. The state-dependent distributions were weighted  
 59 according to the proportion of time spent in the different states, as inferred by the Viterbi sequence.  
 60 Dashed black lines indicate the associated marginal observation distributions. Note that the x- and y-  
 61 axes for step length were truncated at the upper range limit to facilitate visualisation (maximum  
 62 observed step length was 3897 m). Delta BIC values are provided in panel titles.



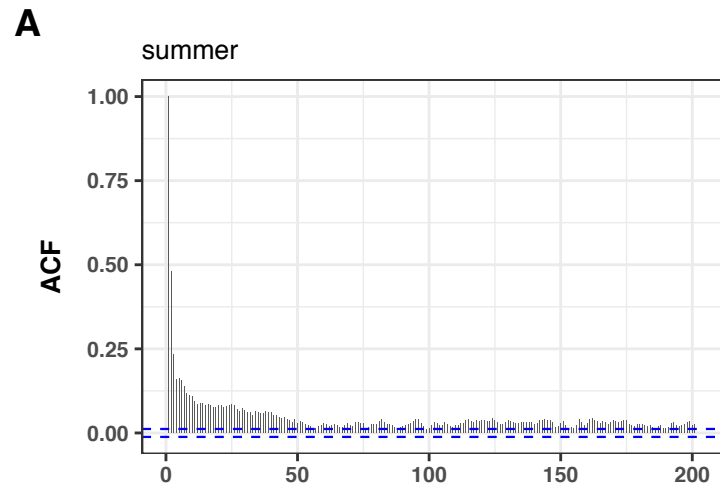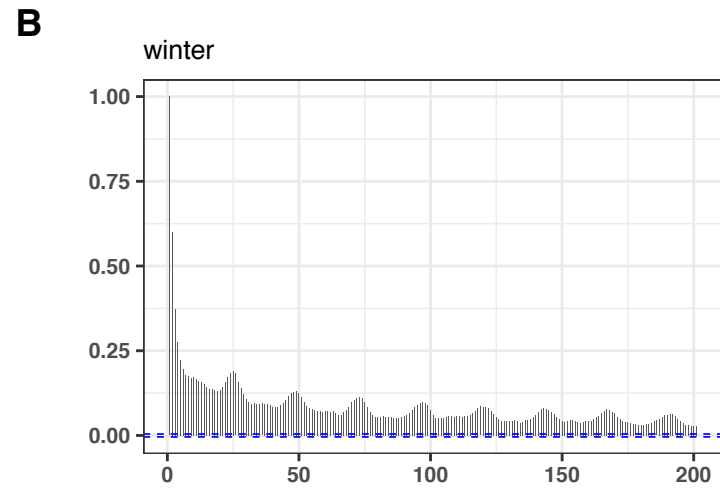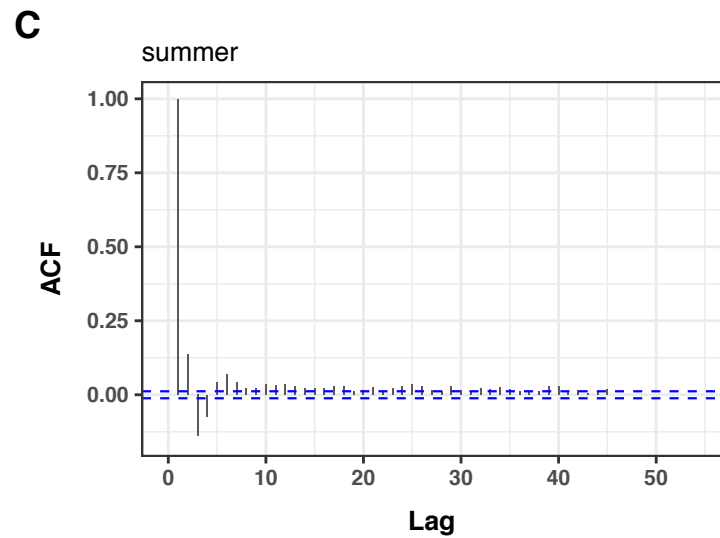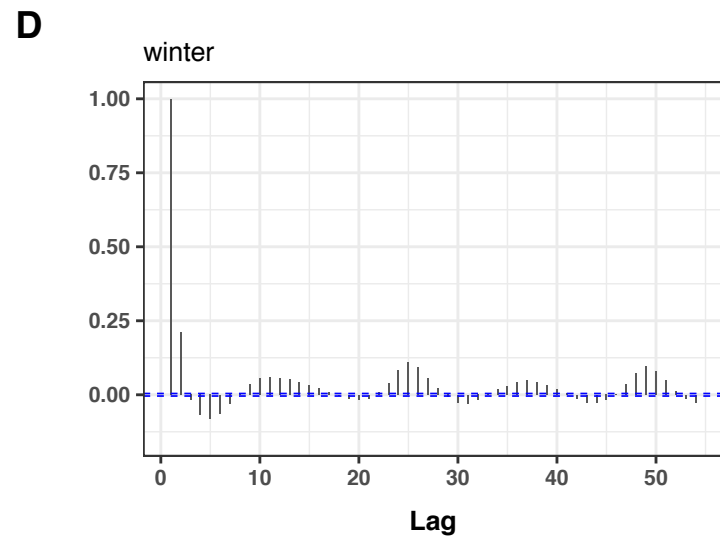

63  
 64 Figure S8: Autocorrelation structure in step length for track bursts classified as (A) summer (snow-free) and (B) winter (snow-covered), as  
 65 well as in pseudo-residuals for the movement variable step length included in the three-state bivariate HMMs fitted to the muskox movement  
 66 data for the (C) summer and (D) winter season (for the best model according to BIC, respectively).

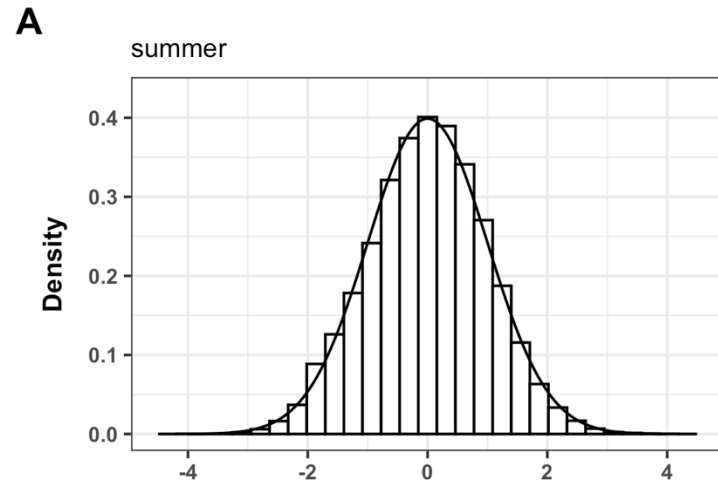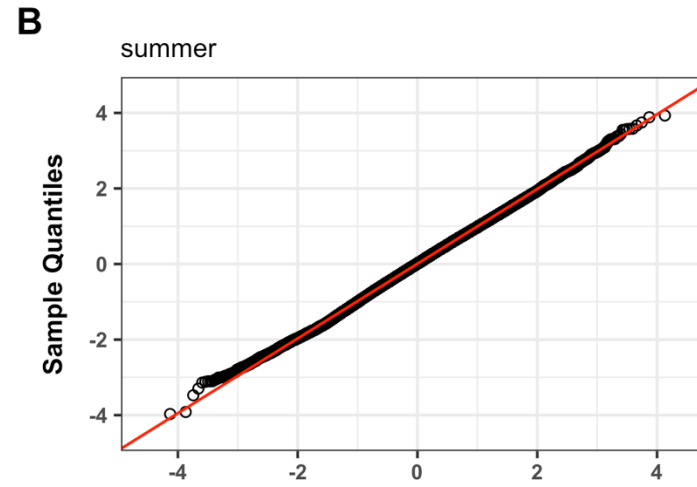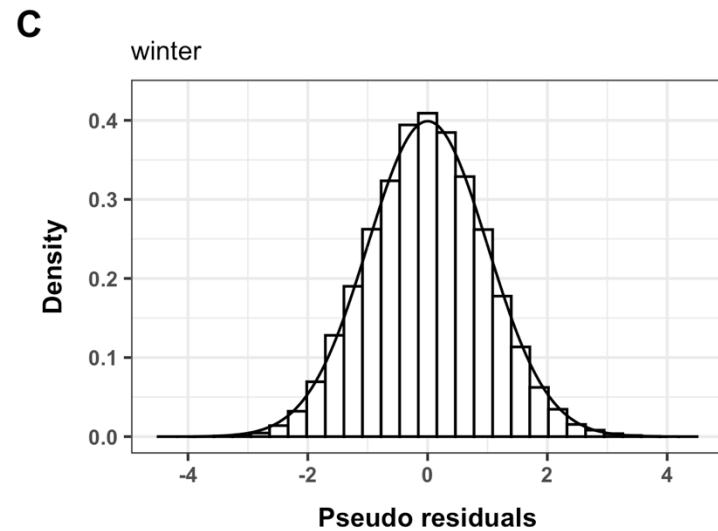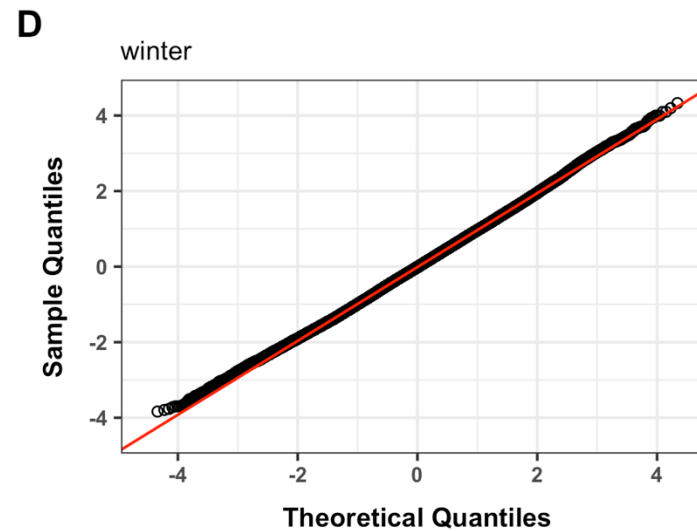

67  
 68 Figure S9: Distribution (A, C) and quantile-quantile (B, D) plots of the pseudo-residuals for the movement variable step length included in  
 69 the three-state bivariate HMMs fitted to the muskox movement data for the summer (snow-free) (A, B) and winter (snow-covered) (C, D)  
 70 season, for the best models according to BIC.

A

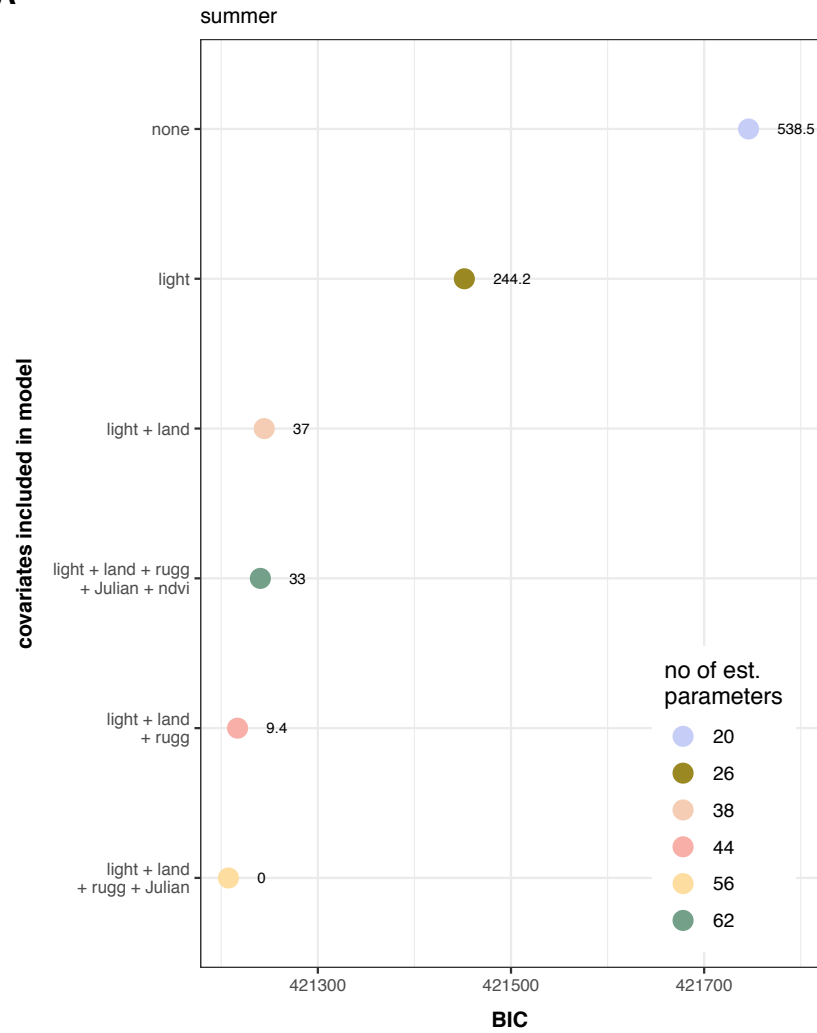

B

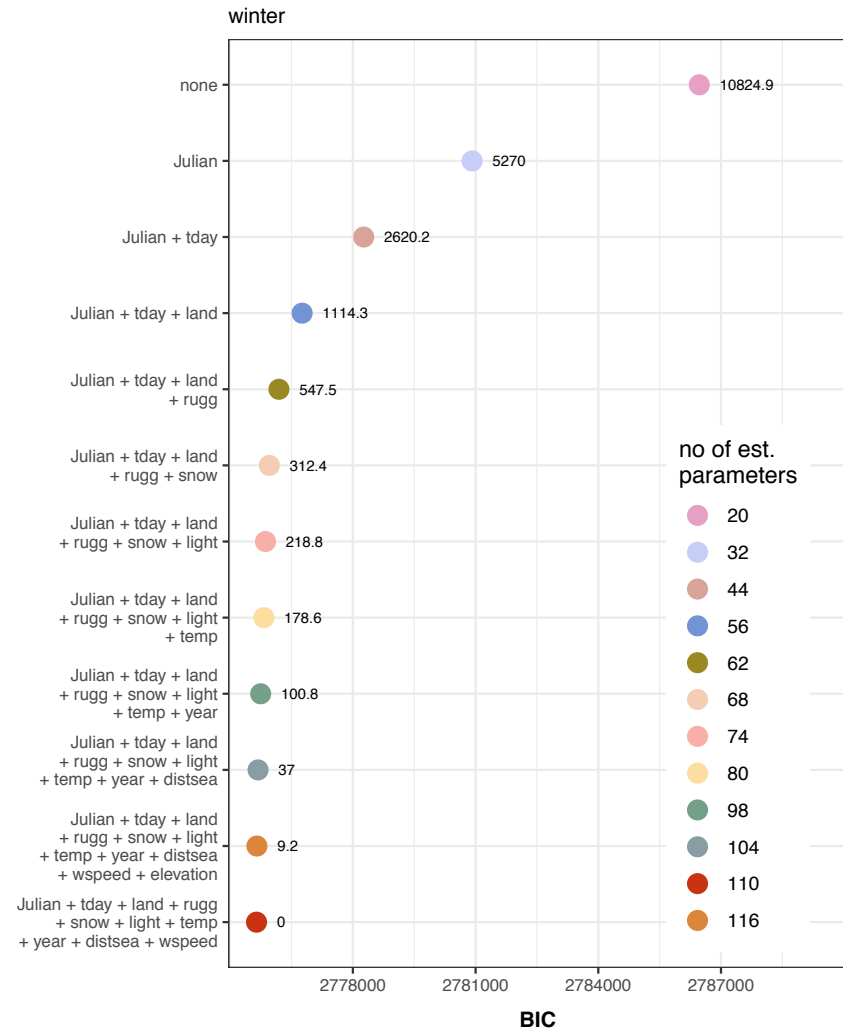

71  
72  
73  
74  
75

Figure S10: Results of the forward model selection process to determine the influence of a total of 14 covariates considered in the HMMs for the (A) summer and (B) winter season, respectively. Covariate selection was based on the Bayesian Information Criterion (BIC). Point labels correspond to differences in BIC values between the respective model and the best-ranked model (i.e. deltaBIC).

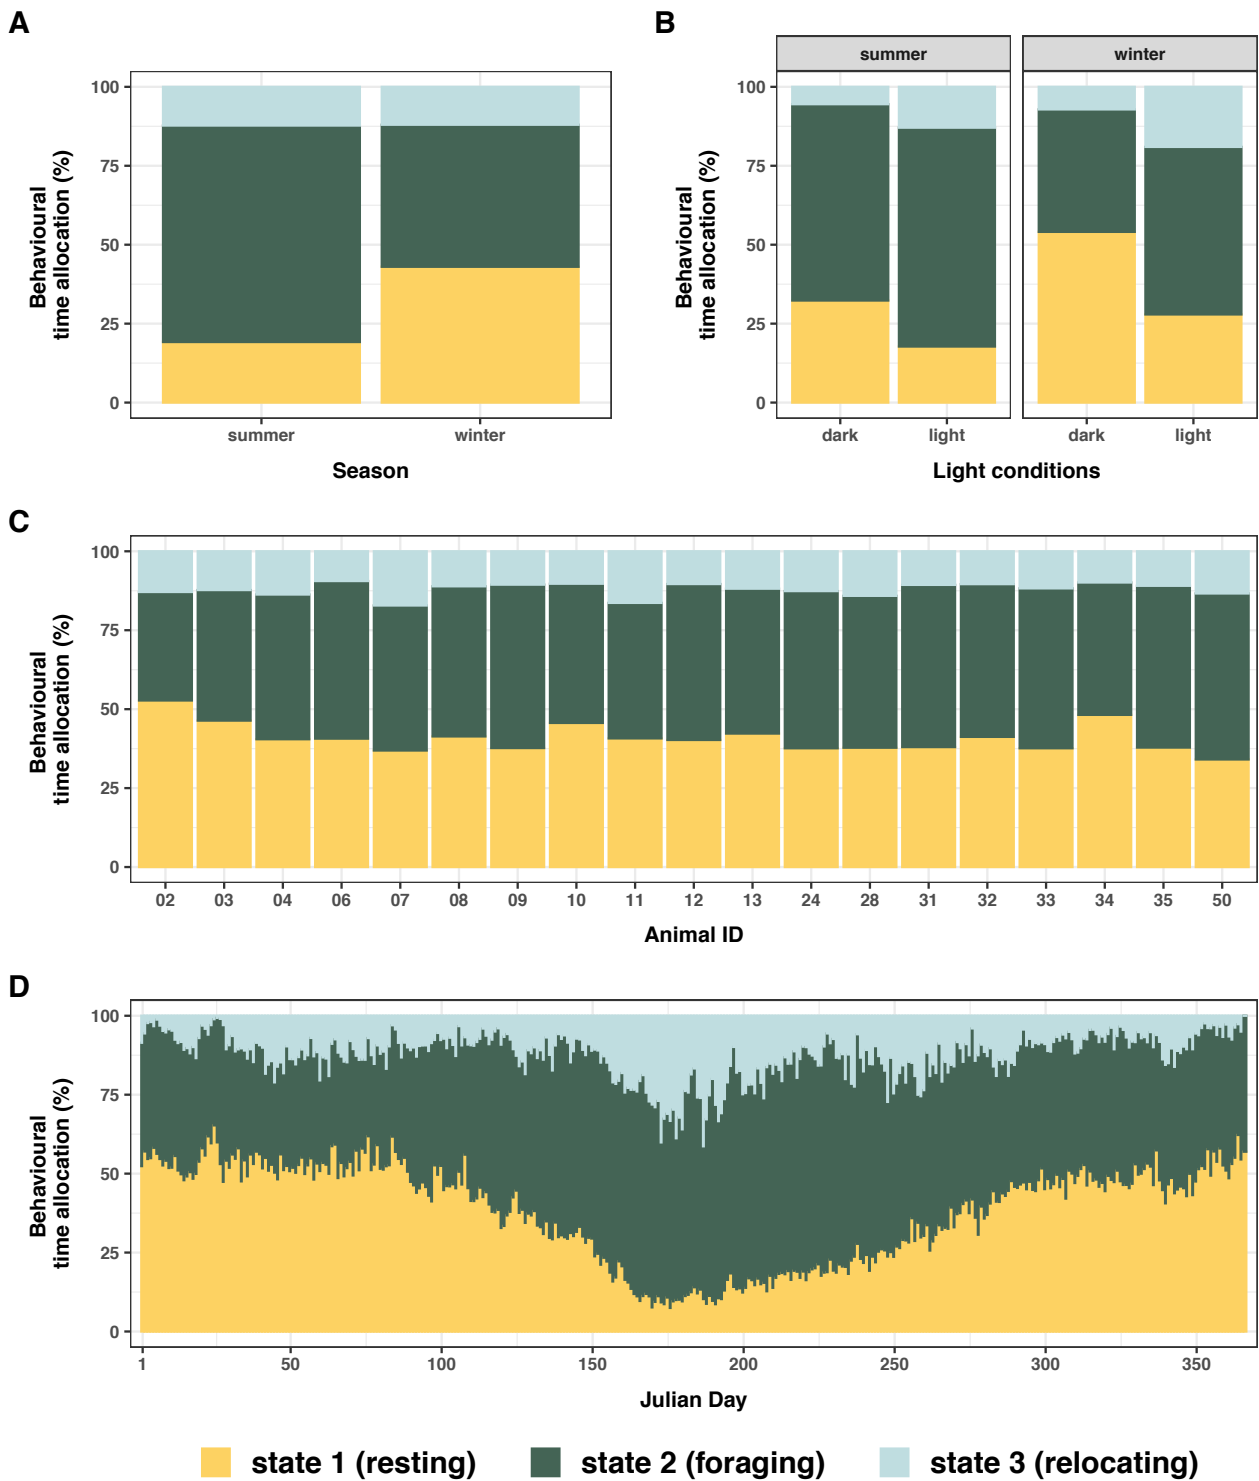

76  
 77 Figure S11: Behavioural time allocation in female muskoxen in northeast Greenland depending on  
 78 (A) season, (B) light conditions (i.e. daylight or darkness at time of observation) for the summer and  
 79 winter season, respectively, (C) animal ID and (D) Julian Day (i.e. day of the year).

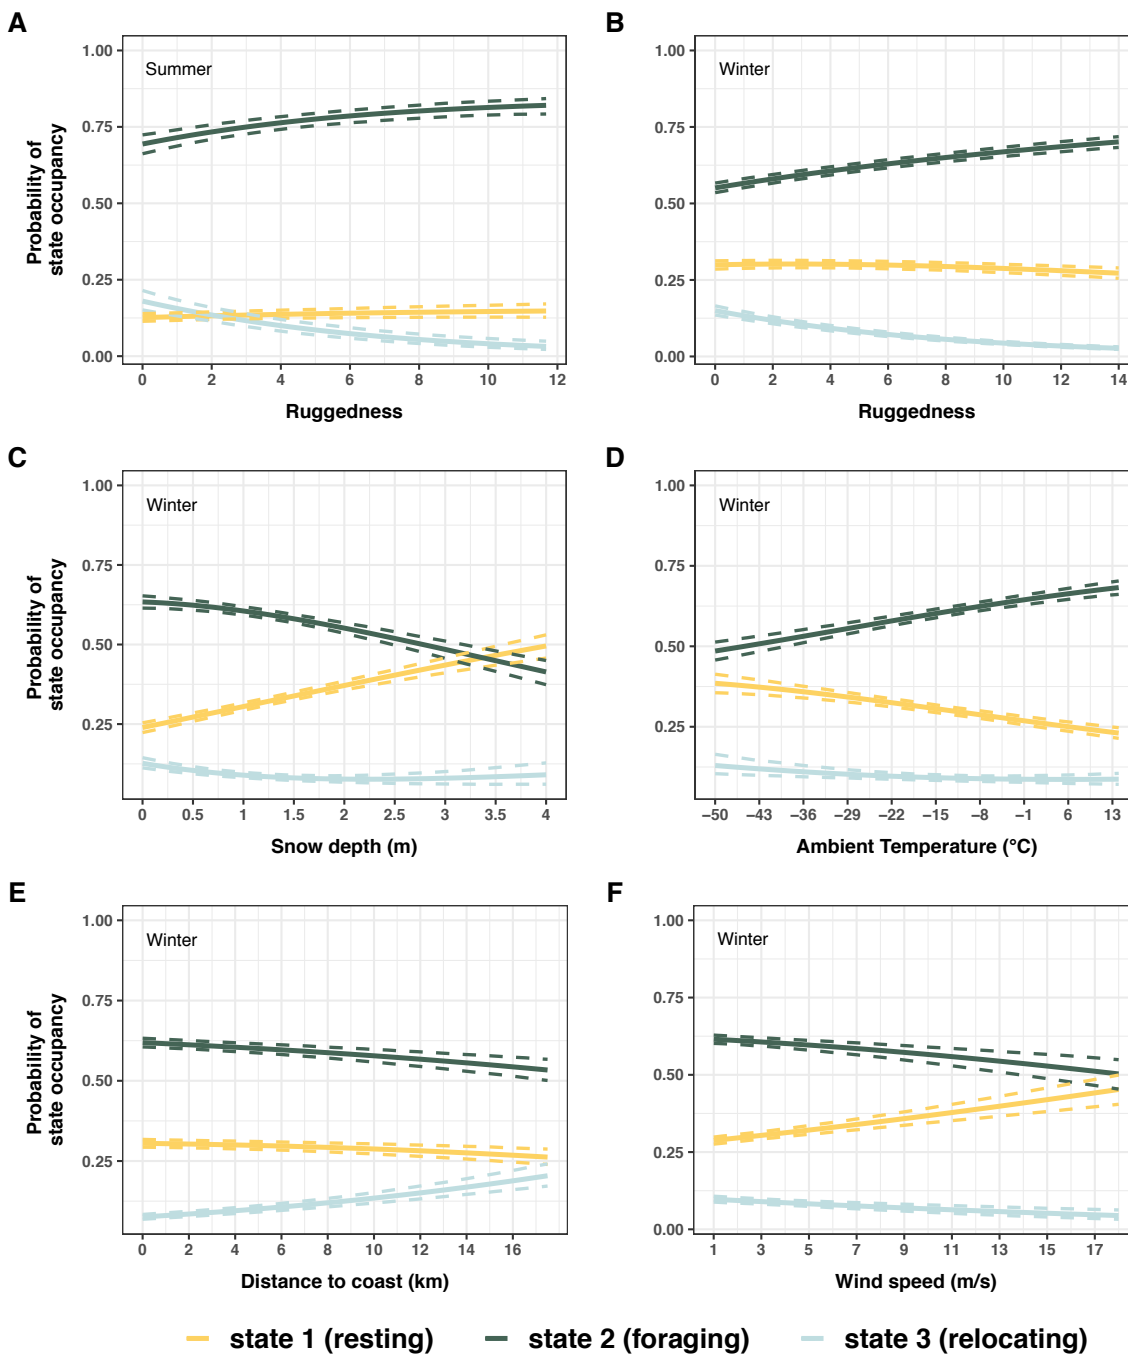

80  
 81 Figure S12: Probabilities (mean and 95% CI) of behavioural state occupancy as a function of the  
 82 environmental covariates included in the BIC-selected bivariate HMMs for the (A) summer and (B-  
 83 F) winter season. Probabilities were calculated for each covariate and state by fixing the values of the  
 84 remaining continuous environmental covariates at their respective seasonal mean. Continuous  
 85 temporal covariates were set to Julian Day 213 (i.e. August 1<sup>st</sup>) and 91 (i.e. April 1<sup>st</sup>) for summer and  
 86 winter, respectively, and to 12 o'clock for time of day. Landcover type was set to **sparse vegetation**,  
 87 and the remaining categorical covariates to their corresponding reference categories (i.e. daylight,  
 88 and winter 2013-2014 for winter model). Monte Carlo simulation from the estimator's approximate  
 89 multivariate normal distribution was used to obtain pointwise 95% CIs.

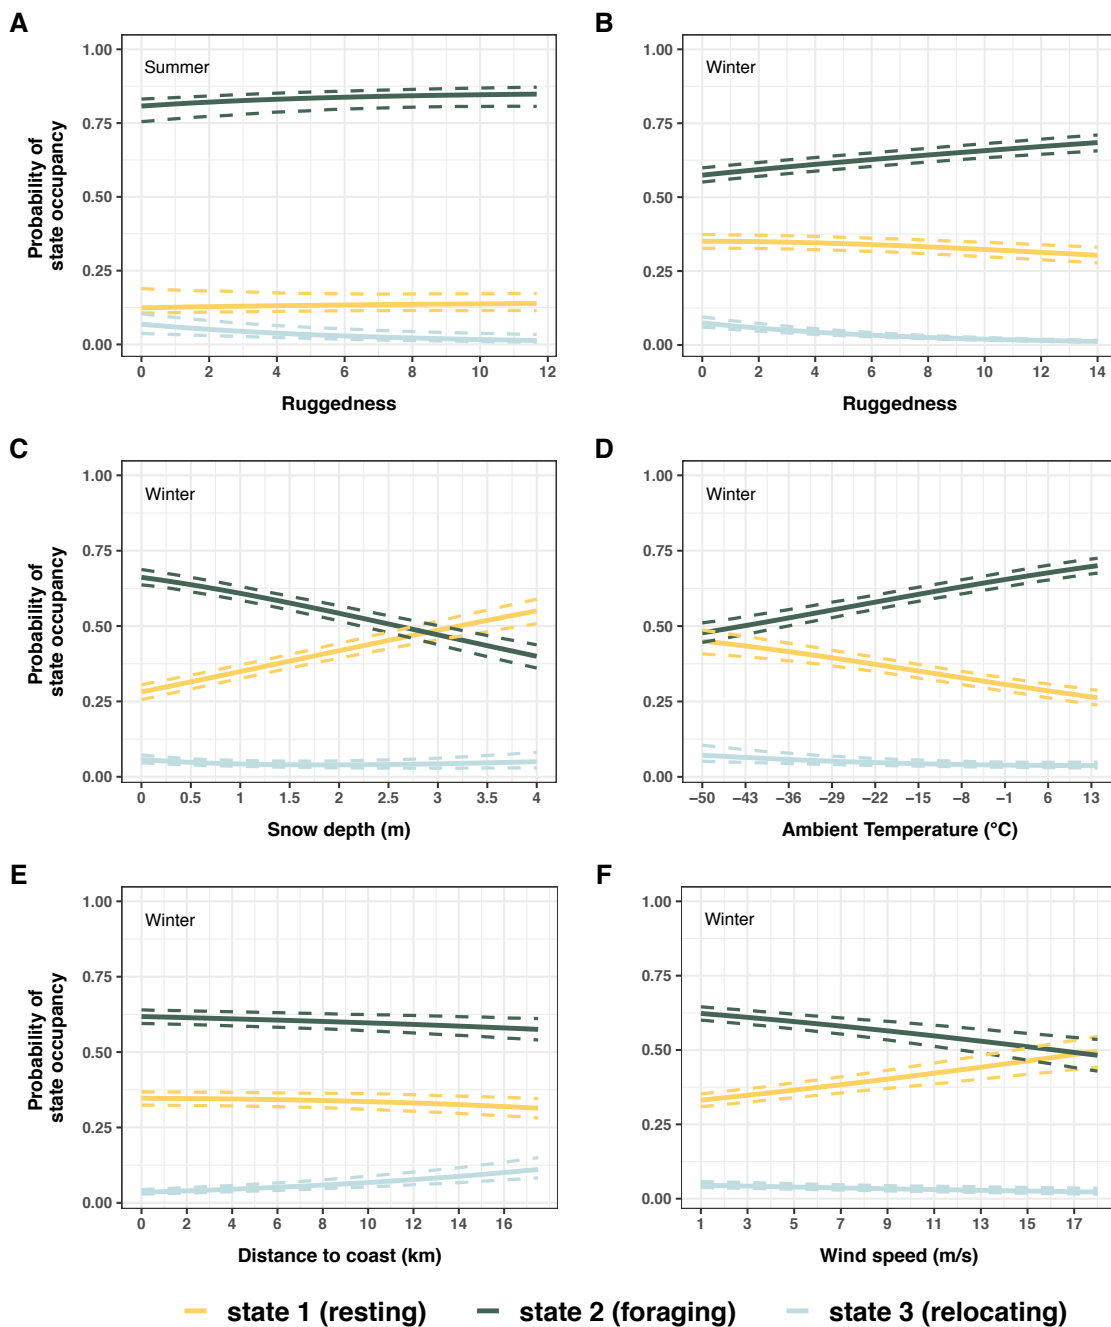

90  
 91 Figure S13: Probabilities (mean and 95% CI) of behavioural state occupancy as a function of the  
 92 environmental covariates included in the BIC-selected bivariate HMMs for the (A) summer and (B-  
 93 F) winter season. Probabilities were calculated for each covariate and state by fixing the values of the  
 94 remaining continuous environmental covariates at their respective seasonal mean. Continuous  
 95 temporal covariates were set to Julian Day 213 (i.e. August 1<sup>st</sup>) and 91 (i.e. April 1<sup>st</sup>) for summer and  
 96 winter, respectively, and to 12 o'clock for time of day. Landcover type was set to **dense vegetation**,  
 97 and the remaining categorical covariates to their corresponding reference categories (i.e. daylight,  
 98 and winter 2013-2014 for winter model). Monte Carlo simulation from the estimator's approximate  
 99 multivariate normal distribution was used to obtain pointwise 95% CIs.

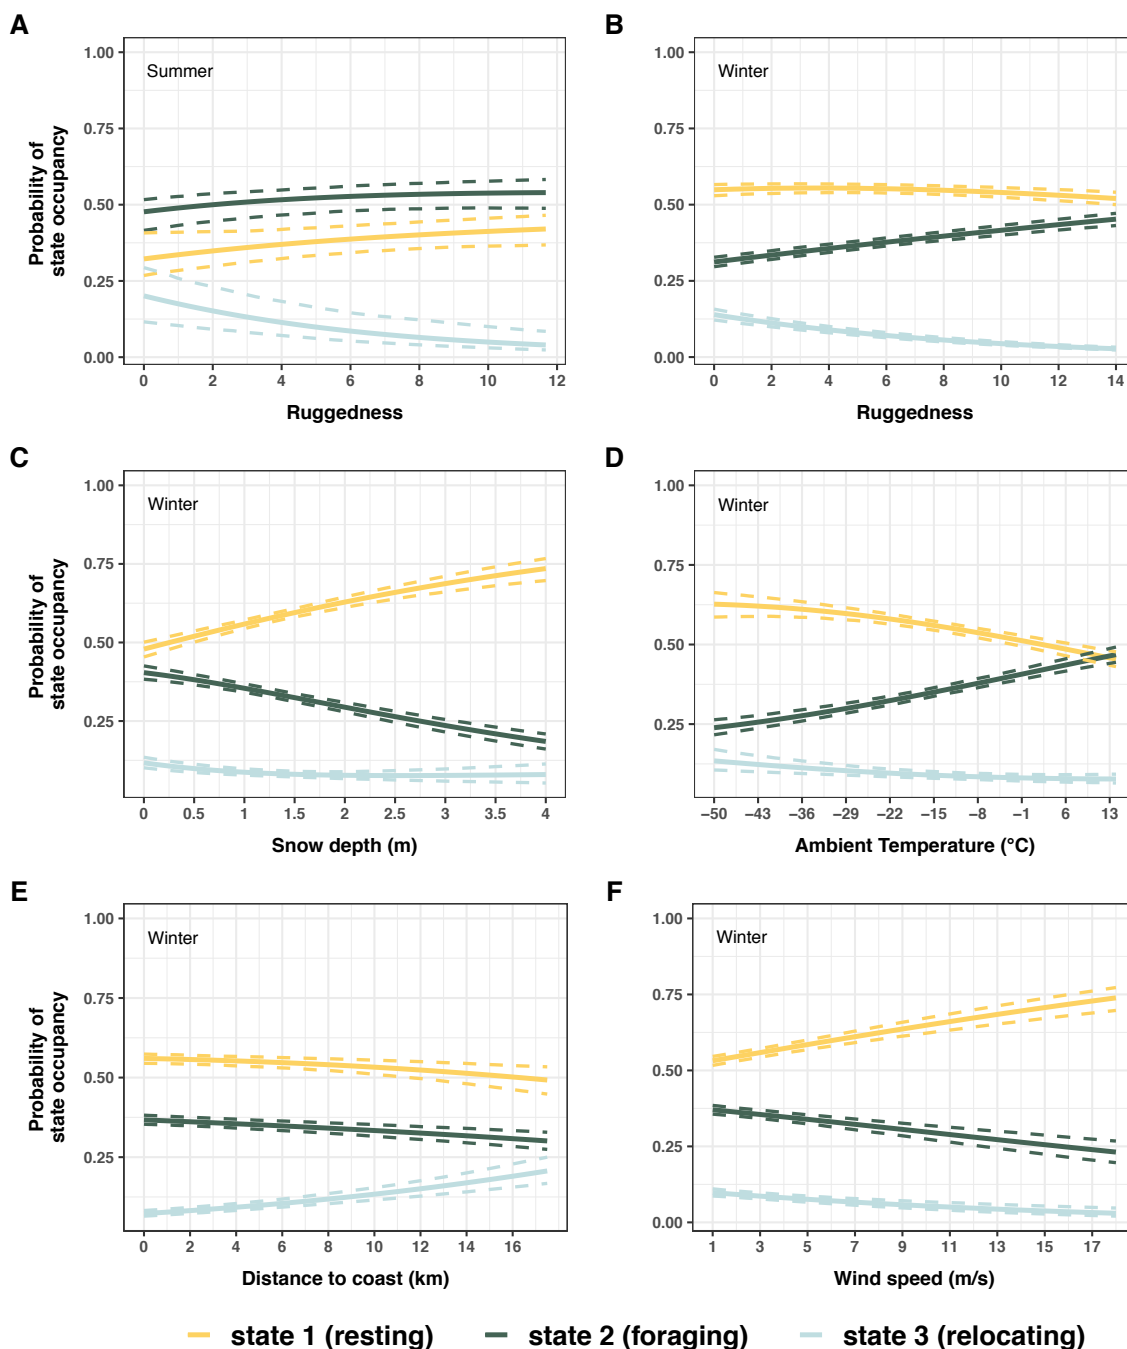

100  
101 Figure S14: Probabilities (mean and 95% CI) of behavioural state occupancy as a function of the  
102 environmental covariates included in the BIC-selected bivariate HMMs for the (A) summer and (B-  
103 F) winter season. Probabilities were calculated for each covariate and state by fixing the values of the  
104 remaining continuous environmental covariates at their respective seasonal mean. Continuous  
105 temporal covariates were set to **Julian Day 243** (i.e. **August 31<sup>st</sup>**) and 91 (i.e. April 1<sup>st</sup>) for summer  
106 and winter, respectively, and to **0 o'clock** for time of day. Light was set to **darkness**, and the  
107 remaining categorical covariates to their corresponding reference categories (i.e. bare ground, and  
108 winter 2013-2014 for winter model). Monte Carlo simulation from the estimator's approximate  
109 multivariate normal distribution was used to obtain pointwise 95% CIs.

A

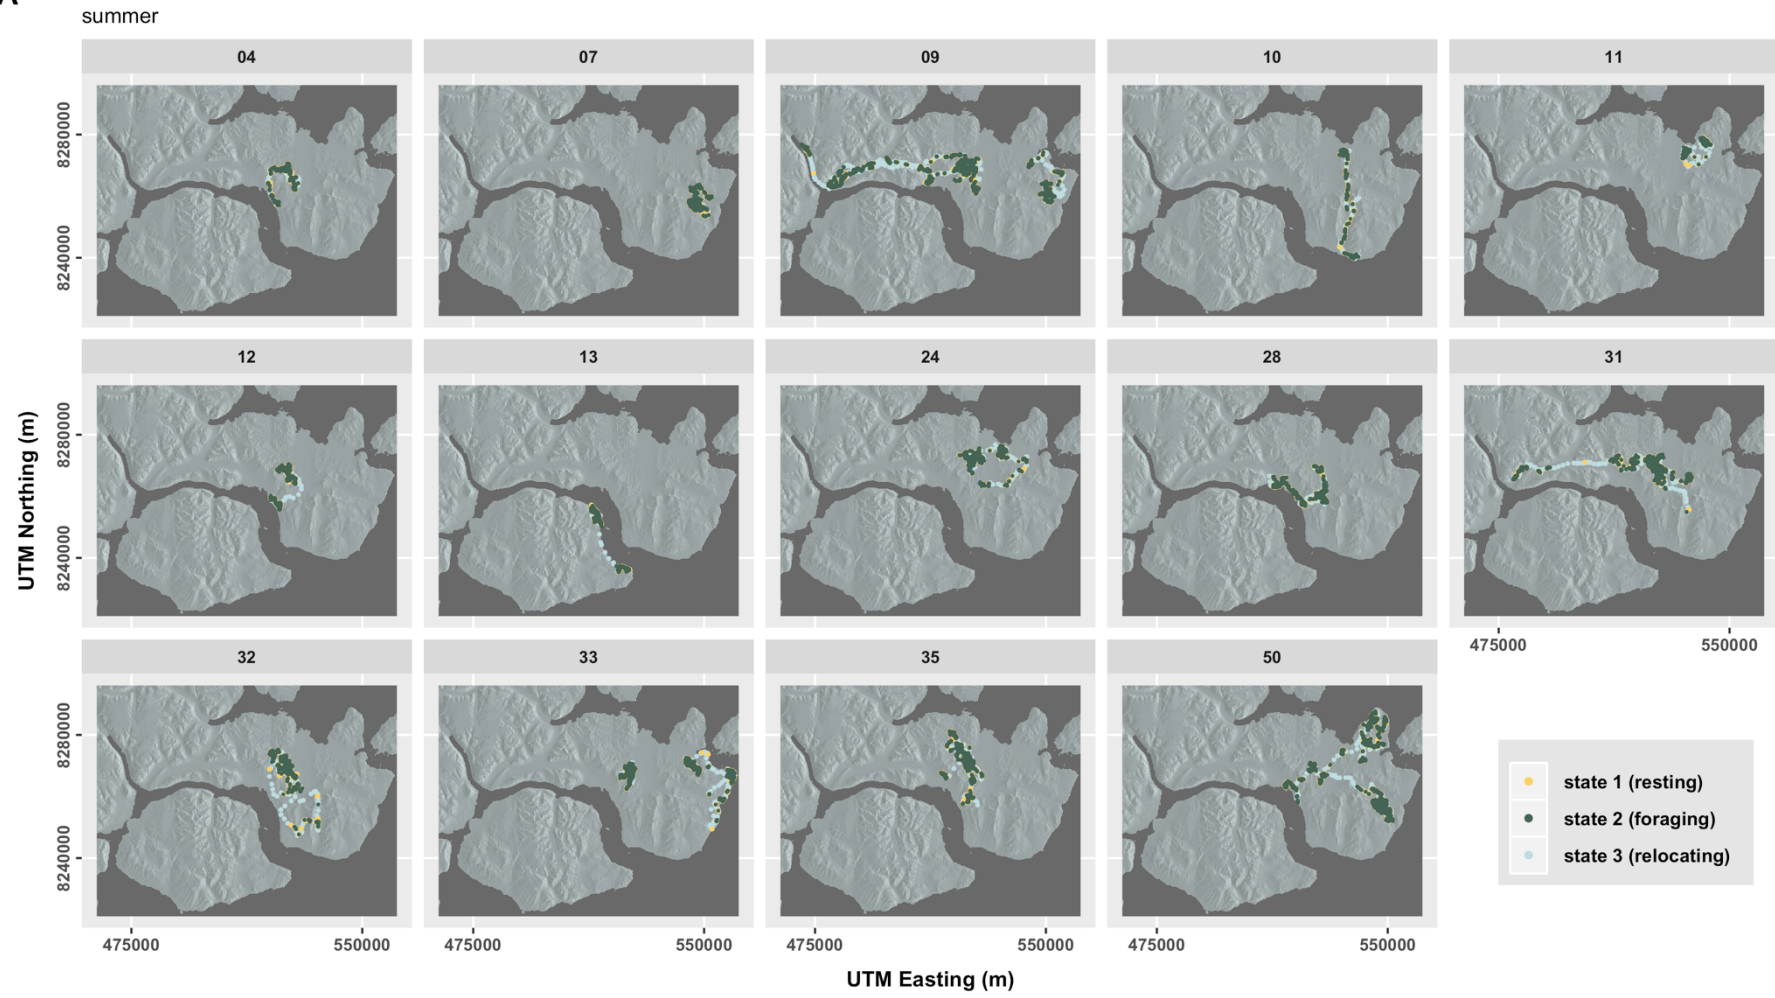



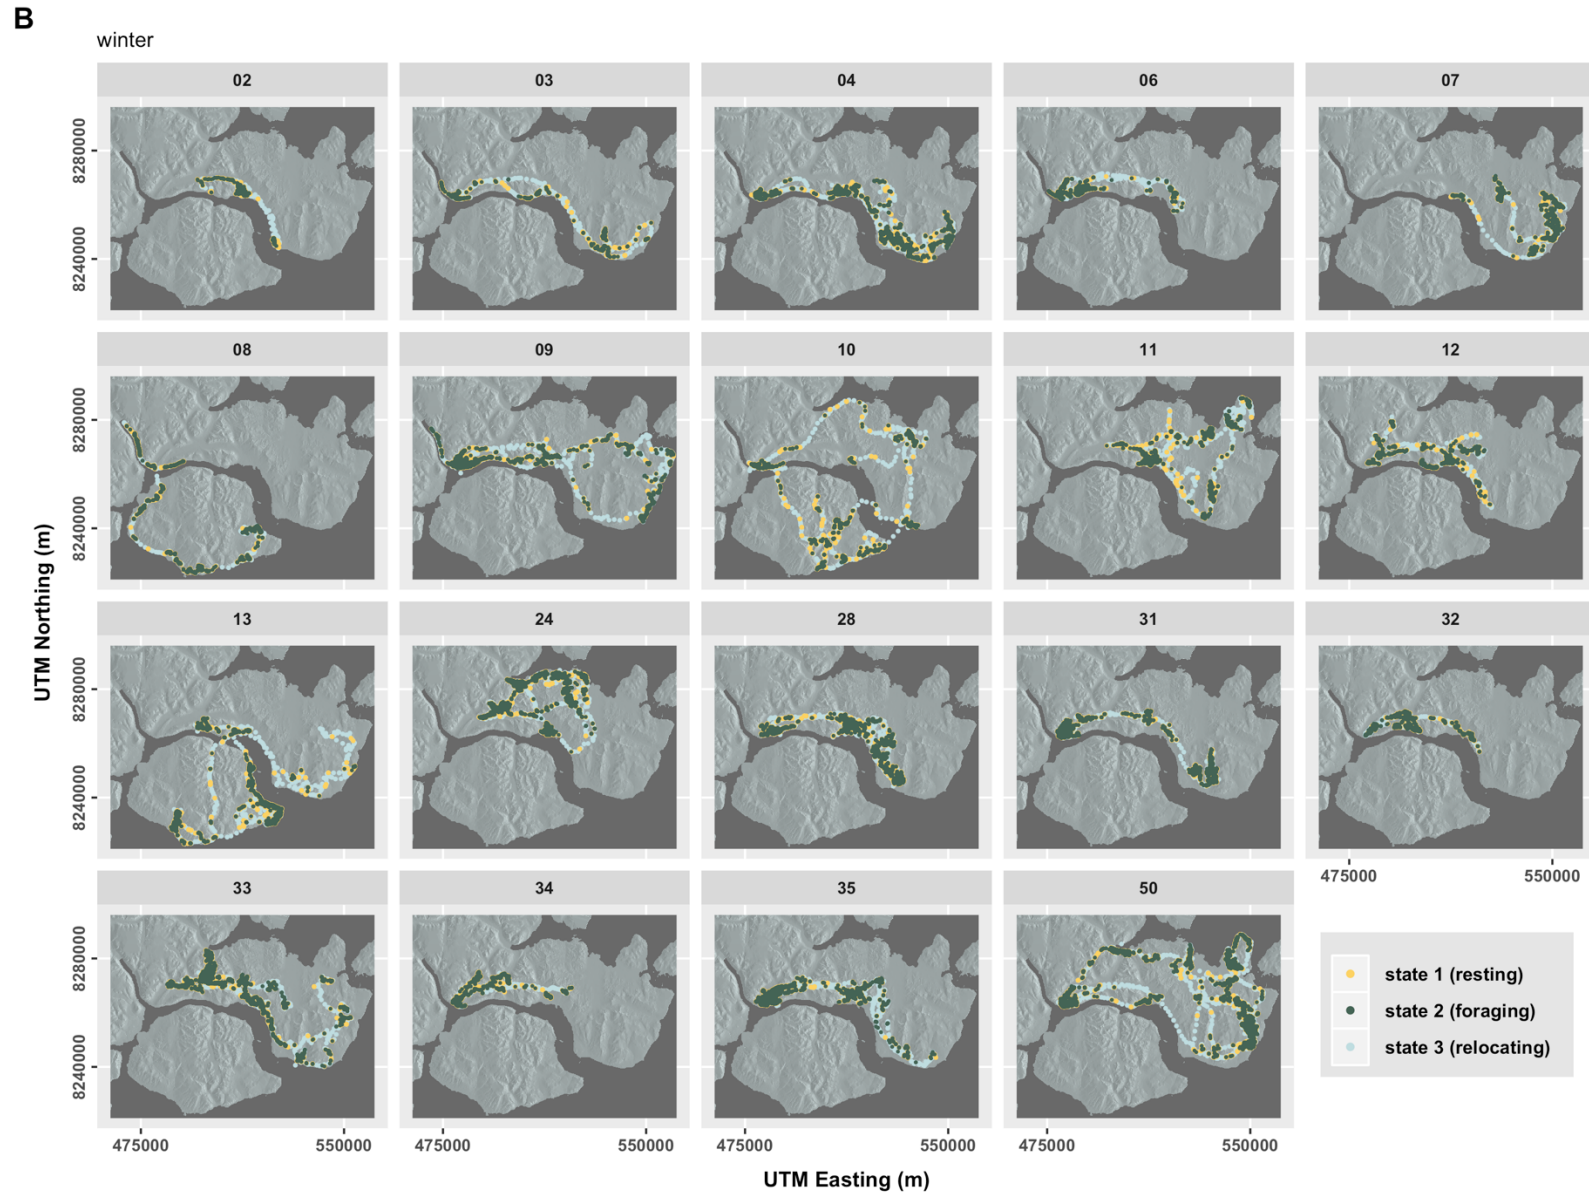

111  
 112 Figure S15: Maps showing muskox locations state-decoded based on the Viterbi algorithm during the (A) snow-free summer und (B) snow-  
 113 covered winter season, by animal ID. Note that animals may have been tracked for more than one winter/summer season.

114 Table S1: Number of observations, observation days, number of bursts, tracks and animals per season  
 115 included in analyses of muskox movement behaviour.  
 116

| <b>season</b>  | <b>n observations</b> | <b>observation days</b> | <b>n bursts</b> | <b>n tracks</b> | <b>n animals</b> |
|----------------|-----------------------|-------------------------|-----------------|-----------------|------------------|
| summer 2014    | 10368                 | 432                     | 10              | 10              | 10               |
| summer 2015    | 4656                  | 194                     | 4               | 4               | 4                |
| summer 2016    | 10120                 | 422                     | 6               | 6               | 6                |
| summer 2017    | 3021                  | 126                     | 3               | 3               | 3                |
| winter 2013/14 | 87074                 | 3628                    | 14              | 14              | 14               |
| winter 2014/15 | 59459                 | 2477                    | 10              | 10              | 10               |
| winter 2015/16 | 44928                 | 1872                    | 20              | 8               | 8                |
| winter 2016/17 | 22752                 | 948                     | 3               | 3               | 3                |
| <b>total</b>   | <b>242378</b>         | <b>10099</b>            | <b>70</b>       | <b>19</b>       | <b>19</b>        |

117

118 Table S2: Coefficients (beta and standard error) of the multinomial logistic regression summer model that were used to predict the probability  
 119 of muskox state occupancy as a function of the BIC-selected covariates (Figure 4 in main manuscript).  
 120

| parameter         | state 1 » 2 |      | state 1 » 3 |      | state 2 » 1 |      | state 2 » 3 |      | state 3 » 1 |       | state 3 » 2 |      |
|-------------------|-------------|------|-------------|------|-------------|------|-------------|------|-------------|-------|-------------|------|
|                   | beta        | se   | beta        | se   | beta        | se   | beta        | se   | beta        | se    | beta        | se   |
| intercept         | -0.48       | 0.72 | -3.93       | 1.91 | -0.86       | 0.41 | -3.98       | 0.82 | -9.91       | 2.54  | -1.84       | 1.15 |
| light*            | 0.9         | 0.11 | 1.39        | 0.81 | -0.61       | 0.09 | -0.03       | 0.23 | 1.13        | 1.77  | -0.95       | 0.28 |
| landcover type*   |             |      |             |      |             |      |             |      |             |       |             |      |
| sparse vegetation | 0.11        | 0.1  | -1.25       | 0.36 | -0.33       | 0.06 | -0.86       | 0.13 | -1.26       | 0.27  | 1.11        | 0.18 |
| dense vegetation  | -0.12       | 0.15 | -2.44       | 1.45 | -0.49       | 0.09 | -1.29       | 0.23 | -6.29       | 10.51 | 2.6         | 0.34 |
| ruggedness        | -0.04       | 0.04 | -0.1        | 0.14 | 0           | 0.03 | -0.42       | 0.08 | 0.06        | 0.1   | 0.33        | 0.09 |
| sin(Julian day)   | 0.46        | 0.51 | 0.48        | 1.01 | -0.43       | 0.26 | -1.17       | 0.49 | -3.38       | 0.93  | -1.32       | 0.71 |
| cos(Julian day)   | -1.36       | 0.59 | -2.69       | 1.73 | 0.21        | 0.36 | -1.62       | 0.73 | -6.79       | 1.65  | -0.52       | 1.01 |

121 \* Reference category is daylight [light] and bare ground [landcover type]

122 Table S3: Coefficients (beta and standard error) of the multinomial logistic regression winter model that were used to predict the probability  
 123 of muskox state occupancy as a function of the BIC-selected covariates (Figure 4 in main manuscript).  
 124

| parameter         | state 1 » 2 |      | state 1 » 3 |      | state 2 » 1 |      | state 2 » 3 |      | state 3 » 1 |      | state 3 » 2 |      |
|-------------------|-------------|------|-------------|------|-------------|------|-------------|------|-------------|------|-------------|------|
|                   | beta        | se   | beta        | se   | beta        | se   | beta        | se   | beta        | se   | beta        | se   |
| intercept         | -1.1        | 0.03 | -1.43       | 0.07 | -1.34       | 0.03 | -3.05       | 0.09 | -1.93       | 0.08 | -1.6        | 0.07 |
| sin(Julian day)   | -0.19       | 0.02 | -0.43       | 0.06 | -0.01       | 0.02 | 0.0         | 0.0  | 0.23        | 0.07 | 0.17        | 0.06 |
| cos(Julian day)   | -0.5        | 0.03 | -1.46       | 0.09 | 0.1         | 0.03 | -0.36       | 0.09 | 0.03        | 0.1  | -0.45       | 0.09 |
| sin(time of day)  | -0.06       | 0.01 | -0.01       | 0.04 | -0.05       | 0.01 | 0.07        | 0.03 | -0.13       | 0.05 | -0.26       | 0.04 |
| cos(time of day)  | -0.28       | 0.02 | -1.3        | 0.06 | 0.27        | 0.02 | 0.01        | 0.04 | 0.36        | 0.05 | 0.02        | 0.04 |
| landcover type*   |             |      |             |      |             |      |             |      |             |      |             |      |
| sparse vegetation | 0.19        | 0.02 | -1.06       | 0.07 | 0.3         | 0.02 | -0.83       | 0.06 | 0.12        | 0.07 | 0.93        | 0.06 |
| dense vegetation  | 0.08        | 0.05 | -1.48       | 0.17 | 0.38        | 0.05 | -1.51       | 0.14 | -0.19       | 0.32 | 1.56        | 0.14 |
| ruggedness        | 0.07        | 0.01 | -0.4        | 0.04 | -0.07       | 0.01 | -0.27       | 0.03 | -0.04       | 0.04 | 0.23        | 0.03 |
| snow depth        | -0.13       | 0.02 | -0.02       | 0.05 | 0.12        | 0.02 | -0.43       | 0.03 | 0.02        | 0.05 | -0.09       | 0.04 |
| year*             |             |      |             |      |             |      |             |      |             |      |             |      |
| winter 2014/15    | 0.22        | 0.03 | -0.4        | 0.07 | -0.11       | 0.03 | 0.52        | 0.07 | 0.17        | 0.08 | 0.07        | 0.07 |
| winter 2015/16    | 0.21        | 0.03 | -0.96       | 0.1  | 0.01        | 0.03 | 0.49        | 0.07 | 0.3         | 0.09 | 0.25        | 0.07 |
| winter 2016/17    | 0.4         | 0.04 | -0.76       | 0.11 | 0.09        | 0.04 | 0.31        | 0.08 | 0.17        | 0.12 | 0.28        | 0.09 |
| light*            | 0.36        | 0.04 | -0.85       | 0.13 | -0.13       | 0.04 | 0.82        | 0.12 | -0.35       | 0.1  | -0.17       | 0.09 |
| temperature       | 0.2         | 0.02 | -0.19       | 0.05 | -0.08       | 0.02 | 0.04        | 0.05 | 0.01        | 0.06 | -0.06       | 0.05 |
| distance to sea   | -0.03       | 0.01 | 0.25        | 0.03 | 0           | 0.01 | 0.08        | 0.03 | 0.01        | 0.03 | -0.09       | 0.03 |
| wind speed        | -0.08       | 0.01 | -0.11       | 0.03 | 0.01        | 0.01 | -0.06       | 0.03 | 0.1         | 0.03 | 0.01        | 0.03 |

125 \* Reference category is bare ground [landcover type], winter 2013/14 [year] and daylight [light]
